# Supplementary material for: Gut Symptoms during FODMAP Restriction and Symptom Response to Food Challenges during FODMAP Reintroduction: A Real-World Evaluation in 21,462 Participants Using a Mobile Application
Source: MDPI journal article supplement (doi:10.3390/nu15122683), 2023-06-09
Supplement: s1 [file s1]

**Figure S1.** Venn diagram to show participant inclusion and overlap between FODMAP restriction, FODMAP reintroduction and FODMAP personalisation

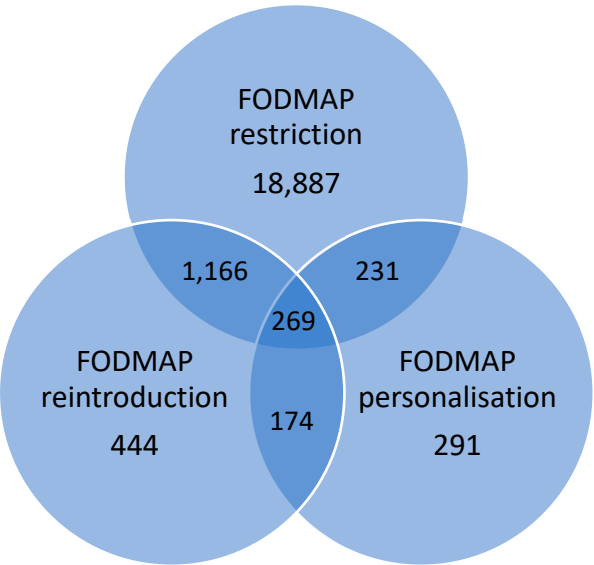

**Table S1.** Symptoms reported by participants at each time of point of their food challenge during FODMAP reintroduction.

| Food challenge     |                                  | Baseline n (%)    | End of challenge (day 1, 2 or 3) n (%) |                  | Reported symptoms at each challenge day n (%) |            |            |
|--------------------|----------------------------------|-------------------|----------------------------------------|------------------|-----------------------------------------------|------------|------------|
|                    |                                  | Reported Symptoms | Reported Symptoms                      | Failed challenge | Day 1                                         | Day 2      | Day 3      |
| FRUCTAN CHALLENGES |                                  |                   |                                        |                  |                                               |            |            |
| Garlic             | Symptoms                         | N=699             | N=699                                  | N=699            | N=699                                         | N=625      | N=547      |
|                    | Abdominal pain                   | 43 (6.2)          | 147 (21.0)                             | 127 (18.2)       | 97 (13.9)                                     | 86 (13.8)  | 58 (10.6)  |
|                    | Bloating                         | 56 (8.0)          | 183 (26.2)                             | 147 (21.0)       | 116 (16.6)                                    | 98 (15.7)  | 88 (16.1)  |
|                    | Flatulence                       | 56 (8.0)          | 178 (25.5)                             | 135 (19.3)       | 113 (16.2)                                    | 107 (17.1) | 90 (16.5)  |
|                    | Diarrhoea                        | 28 (4.0)          | 83 (11.9)                              | 72 (10.3)        | 54 (7.7)                                      | 44 (7.0)   | 36 (6.6)   |
|                    | Constipation                     | 37 (5.3)          | 59 (8.4)                               | 47 (6.7)         | 46 (6.6)                                      | 44 (7.0)   | 29 (5.3)   |
|                    | Overall                          | 49 (7.0)          | 204 (29.2)                             | 178 (25.5)       | 121 (17.3)                                    | 115 (18.4) | 95 (17.4)  |
|                    | Discontinued challenge [(n (%))] |                   |                                        | 245 (35.1)       | 74 (10.6)                                     | 78 (12.5)  | 93 (17.0)  |
| Onion              | Symptoms                         | N=918             | N=918                                  | N=918            | N=918                                         | N=790      | N=702      |
|                    | Abdominal pain                   | 64 (7.0)          | 237 (25.8)                             | 200 (21.8)       | 141 (15.4)                                    | 106 (13.4) | 116 (16.5) |
|                    | Bloating                         | 76 (8.3)          | 279 (30.4)                             | 219 (23.9)       | 152 (16.6)                                    | 138 (17.5) | 150 (21.4) |
|                    | Flatulence                       | 88 (9.6)          | 219 (31.7)                             | 214 (23.3)       | 171 (18.6)                                    | 164 (20.8) | 164 (23.4) |
|                    | Diarrhoea                        | 41 (4.5)          | 122 (13.3)                             | 99 (10.8)        | 69 (7.5)                                      | 61 (7.7)   | 65 (9.3)   |
|                    | Constipation                     | 54 (5.9)          | 104 (11.3)                             | 76 (8.3)         | 70 (7.6)                                      | 59 (7.5)   | 64 (9.1)   |
|                    | Overall                          | 84 (9.2)          | 315 (34.3)                             | 269 (29.3)       | 173 (18.8)                                    | 157 (19.9) | 156 (22.2) |
|                    | Discontinued challenge [(n (%))] |                   |                                        | 359 (39.1)       | 128 (13.9)                                    | 88 (11.1)  | 143 (20.4) |
| Wheat bread        | Symptoms                         | N=1146            | N=1146                                 | N=1146           | N=1146                                        | N=1008     | N=887      |
|                    | Abdominal pain                   | 75 (6.5)          | 293 (25.6)                             | 247 (21.5)       | 155 (13.5)                                    | 147 (14.6) | 148 (16.7) |
|                    | Bloating                         | 113 (9.9)         | 392 (34.2)                             | 309 (27.0)       | 214 (18.7)                                    | 200 (19.8) | 208 (23.4) |
|                    | Flatulence                       | 110 (9.6)         | 329 (28.7)                             | 255 (22.3)       | 180 (15.7)                                    | 184 (18.3) | 185 (20.9) |
|                    | Diarrhoea                        | 60 (5.2)          | 147 (12.8)                             | 122 (10.6)       | 86 (7.5)                                      | 79 (7.8)   | 72 (8.1)   |
|                    | Constipation                     | 76 (6.6)          | 170 (14.8)                             | 124 (10.8)       | 106 (9.2)                                     | 91 (9.0)   | 97 (10.9)  |
|                    | Overall                          | 115 (10.0)        | 424 (37.0)                             | 361 (31.5)       | 207 (19.0)                                    | 215 (21.3) | 216 (24.4) |
|                    | Discontinued challenge [(n (%))] |                   |                                        | 474 (41.4)       | 138 (12.0)                                    | 121 (12.0) | 215 (24.2) |

|                                    |                                  |              |              |              |              |              |              |
|------------------------------------|----------------------------------|--------------|--------------|--------------|--------------|--------------|--------------|
| Wheat pasta                        | <i>Symptoms</i>                  | <i>N=548</i> | <i>N=548</i> | <i>N=548</i> | <i>N=548</i> | <i>N=468</i> | <i>N=414</i> |
|                                    | Abdominal pain                   | 35 (6.4)     | 153 (27.9)   | 130 (23.7)   | 86 (15.7)    | 70 (15.0)    | 68 (16.4)    |
|                                    | Bloating                         | 51 (9.3)     | 189 (34.5)   | 151 (27.6)   | 111 (20.3)   | 87 (18.6)    | 97 (23.4)    |
|                                    | Flatulence                       | 45 (8.2)     | 156 (28.5)   | 119 (21.7)   | 94 (17.2)    | 79 (16.9)    | 86 (20.8)    |
|                                    | Diarrhoea                        | 26 (4.7)     | 78 (14.2)    | 64 (11.7)    | 46 (8.4)     | 37 (7.9)     | 35 (8.5)     |
|                                    | Constipation                     | 32 (5.8)     | 87 (15.9)    | 60 (10.9)    | 48 (8.8)     | 27 (5.8)     | 45 (10.9)    |
|                                    | Overall                          | 44 (8.0)     | 189 (34.5)   | 162 (29.6)   | 102 (18.6)   | 87 (18.6)    | 91 (22.0)    |
|                                    | Discontinued challenge [(n (%))] |              |              | 222 (40.5)   | 80 (14.6)    | 54 (11.5)    | 88 (21.3)    |
| Wheat Cereal                       | <i>Symptoms</i>                  | <i>N=453</i> | <i>N=453</i> | <i>N=453</i> | <i>N=453</i> | <i>N=377</i> | <i>N=345</i> |
|                                    | Abdominal pain                   | 34 (7.5)     | 109 (24.1)   | 96 (21.2)    | 71 (15.7)    | 36 (9.5)     | 48 (13.9)    |
|                                    | Bloating                         | 41 (9.1)     | 119 (26.3)   | 96 (21.2)    | 77 (17.0)    | 49 (13.0)    | 57 (16.5)    |
|                                    | Flatulence                       | 41 (9.1)     | 116 (25.6)   | 91 (20.1)    | 75 (16.6)    | 53 (13.6)    | 60 (17.4)    |
|                                    | Diarrhoea                        | 22 (4.9)     | 76 (16.8)    | 67 (14.8)    | 45 (9.9)     | 28 (7.4)     | 34 (9.9)     |
|                                    | Constipation                     | 30 (6.6)     | 58 (12.8)    | 42 (9.3)     | 49 (10.8)    | 28 (7.4)     | 31 (9.0)     |
|                                    | Overall                          | 41 (9.1)     | 132 (29.1)   | 115 (25.4)   | 86 (19.0)    | 50 (13.3)    | 56 (16.2)    |
|                                    | Discontinued challenge [(n (%))] |              |              | 176 (38.9)   | 76 (16.8)    | 32 (8.5)     | 68 (19.7)    |
| GALACTO-OLIGOSACCHARIDE CHALLENGES |                                  |              |              |              |              |              |              |
| Peas                               | <i>Symptoms</i>                  | <i>N=331</i> | <i>N=331</i> | <i>N=331</i> | <i>N=331</i> | <i>N=301</i> | <i>N=227</i> |
|                                    | Abdominal pain                   | 9 (2.7)      | 58 (17.5)    | 52 (15.7)    | 24 (7.3)     | 32 (10.6)    | 27 (9.7)     |
|                                    | Bloating                         | 17 (5.1)     | 67 (20.2)    | 49 (14.2)    | 28 (8.5)     | 37 (12.3)    | 44 (15.9)    |
|                                    | Flatulence                       | 10 (3.0)     | 74 (22.4)    | 49 (14.2)    | 33 (10.0)    | 38 (12.6)    | 55 (19.9)    |
|                                    | Diarrhoea                        | 13 (3.9)     | 26 (7.9)     | 19 (5.7)     | 17 (5.1)     | 12 (4.0)     | 17 (6.1)     |
|                                    | Constipation                     | 9 (2.7)      | 20 (6.0)     | 13 (3.9)     | 17 (5.1)     | 14 (4.7)     | 14 (5.1)     |
|                                    | Overall                          | 14 (4.2)     | 75 (22.7)    | 63 (19.0)    | 35 (10.6)    | 36 (12.0)    | 42 (15.2)    |
|                                    | Discontinued challenge [(n (%))] |              |              | 98 (29.6)    | 30 (9.1)     | 24 (8.0)     | 44 (19.4)    |
| Canned chickpeas                   | <i>Symptoms</i>                  | <i>N=179</i> | <i>N=179</i> | <i>N=179</i> | <i>N=179</i> | <i>N=162</i> | <i>N=139</i> |
|                                    | Abdominal pain                   | 15 (8.4)     | 44 (24.6)    | 36 (20.1)    | 23 (12.8)    | 22 (13.6)    | 20 (14.4)    |
|                                    | Bloating                         | 20 (11.2)    | 62 (34.6)    | 47 (26.3)    | 33 (18.4)    | 32 (19.8)    | 28 (20.1)    |

|              |                                         |              |              |                  |                  |                  |                  |
|--------------|-----------------------------------------|--------------|--------------|------------------|------------------|------------------|------------------|
|              | Flatulence                              | 17 (9.5)     | 66 (36.9)    | 43 (24.0)        | 34 (19.0)        | 38 (23.5)        | 34 (24.5)        |
|              | Diarrhoea                               | 6 (3.4)      | 21 (11.7)    | 19 (10.6)        | 9 (5.0)          | 9 (5.6)          | 11 (7.9)         |
|              | Constipation                            | 12 (6.7)     | 20 (11.2)    | 14 (7.8)         | 14 (7.8)         | 14 (8.6)         | 11 (7.9)         |
|              | Overall                                 | 19 (10.6)    | 61 (34.1)    | 48 (26.8)        | 28 (15.6)        | 32 (19.8)        | 27 (19.4)        |
|              | <b>Discontinued challenge [(n (%))]</b> |              |              | <b>62 (34.6)</b> | <b>17 (9.5)</b>  | <b>23 (14.2)</b> | <b>22 (15.8)</b> |
| Butter beans | <i>Symptoms</i>                         | <i>N=170</i> | <i>N=170</i> | <i>N=170</i>     | <i>N=170</i>     | <i>N=142</i>     | <i>N=129</i>     |
|              | Abdominal pain                          | 12 (7.1)     | 35 (20.6)    | 34 (20.0)        | 22 (12.9)        | 15 (10.6)        | 10 (7.8)         |
|              | Bloating                                | 18 (10.6)    | 44 (25.9)    | 36 (21.2)        | 28 (16.5)        | 16 (11.3)        | 18 (14.0)        |
|              | Flatulence                              | 12 (7.1)     | 45 (26.5)    | 37 (21.8)        | 32 (18.8)        | 20 (14.1)        | 20 (15.5)        |
|              | Diarrhoea                               | 6 (3.5)      | 19 (11.2)    | 17 (10.0)        | 10 (5.9)         | 7 (4.9)          | 5 (3.9)          |
|              | Constipation                            | 8 (4.7)      | 18 (10.6)    | 12 (7.1)         | 13 (7.6)         | 8 (5.6)          | 9 (7.0)          |
|              | Overall                                 | 16 (9.4)     | 54 (31.8)    | 49 (28.8)        | 31 (18.2)        | 18 (12.7)        | 21 (16.3)        |
|              | <b>Discontinued challenge [(n (%))]</b> |              |              | <b>61 (35.9)</b> | <b>28 (16.5)</b> | <b>13 (9.2)</b>  | <b>20 (15.5)</b> |
| Almonds      | <i>Symptoms</i>                         | <i>N=149</i> | <i>N=149</i> | <i>N=149</i>     | <i>N=149</i>     | <i>N=132</i>     | <i>N=129</i>     |
|              | Abdominal pain                          | 6 (4.0)      | 18 (12.1)    | 16 (10.7)        | 17 (11.4)        | 7 (5.3)          | 7 (5.4)          |
|              | Bloating                                | 10 (6.7)     | 21 (14.1)    | 16 (10.7)        | 18 (12.1)        | 6 (4.5)          | 9 (7.0)          |
|              | Flatulence                              | 12 (8.1)     | 18 (12.1)    | 12 (8.1)         | 14 (9.4)         | 6 (4.5)          | 9 (7.0)          |
|              | Diarrhea                                | 3 (2.0)      | 8 (5.4)      | 8 (5.4)          | 6 (4.0)          | 1 (0.8)          | 3 (2.3)          |
|              | Constipation                            | 3 (2.0)      | 13 (8.7)     | 9 (6.0)          | 13 (8.7)         | 7 (5.3)          | 7 (5.4)          |
|              | Overall                                 | 7 (4.7)      | 24 (16.1)    | 20 (13.4)        | 21 (14.1)        | 8 (6.1)          | 11 (8.5)         |
|              | <b>Discontinued challenge [(n (%))]</b> |              |              | <b>34 (22.8)</b> | <b>17 (11.4)</b> | <b>3 (2.3)</b>   | <b>14 (10.9)</b> |
| Karela       | <i>Symptoms</i>                         | <i>N=23</i>  | <i>N=23</i>  | <i>N=23</i>      | <i>N=23</i>      | <i>N=16</i>      | <i>N=15</i>      |
|              | Abdominal pain                          | 3 (13.0)     | 9 (39.1)     | 8 (34.8)         | 8 (34.8)         | 2 (12.5)         | 2 (13.3)         |
|              | Bloating                                | 3 (13.0)     | 9 (39.1)     | 9 (39.1)         | 9 (39.1)         | 2 (12.5)         | 1 (6.7)          |
|              | Flatulence                              | 5 (21.7)     | 9 (39.1)     | 7 (30.4)         | 8 (34.8)         | 3 (18.8)         | 3 (20.0)         |
|              | Diarrhoea                               | 3 (13.0)     | 8 (34.8)     | 7 (30.4)         | 7 (30.4)         | 2 (12.5)         | 2 (13.3)         |
|              | Constipation                            | 2 (8.7)      | 6 (26.1)     | 4 (17.4)         | 4 (17.4)         | 2 (12.5)         | 2 (13.3)         |
|              | Overall                                 | 3 (13.0)     | 8 (34.8)     | 8 (34.8)         | 8 (34.8)         | 2 (12.5)         | 1 (6.7)          |

|                             | Discontinued challenge [(n (%))] |           |            | 9 (39.1)   | 7 (30.4)   | 1 (6.3)    | 1 (6.7)    |
|-----------------------------|----------------------------------|-----------|------------|------------|------------|------------|------------|
| LACTOSE CHALLENGES          |                                  |           |            |            |            |            |            |
| Milk (cow, goat or sheep)   | Symptoms                         | N=687     | N=687      | N=687      | N=687      | N=596      | N=517      |
|                             | Abdominal pain                   | 42 (6.1)  | 173 (25.2) | 157 (22.9) | 105 (15.3) | 91 (15.3)  | 69 (13.3)  |
|                             | Bloating                         | 47 (6.8)  | 175 (25.5) | 148 (21.5) | 107 (15.6) | 94 (16.8)  | 73 (14.1)  |
|                             | Flatulence                       | 54 (7.9)  | 196 (28.5) | 164 (23.9) | 115 (16.7) | 113 (19.0) | 91 (17.6)  |
|                             | Diarrhoea                        | 28 (4.1)  | 109 (15.9) | 97 (14.1)  | 67 (9.8)   | 41 (6.9)   | 39 (7.5)   |
|                             | Constipation                     | 37 (5.4)  | 72 (10.5)  | 55 (8.0)   | 44 (6.4)   | 33 (5.5)   | 35 (6.8)   |
|                             | Overall                          | 48 (7.0)  | 231 (33.6) | 204 (29.7) | 121 (17.6) | 121 (20.3) | 96 (18.6)  |
|                             | Discontinued challenge [(n (%))] |           |            | 274 (39.9) | 91 (13.2)  | 79 (13.3)  | 104 (20.1) |
| Yogurt (cow, goat or sheep) | Symptoms                         | N=252     | N=252      | N=252      | N=252      | N=220      | N=192      |
|                             | Abdominal pain                   | 16 (6.3)  | 56 (22.2)  | 48 (19.0)  | 43 (17.1)  | 27 (12.3)  | 20 (10.4)  |
|                             | Bloating                         | 21 (8.3)  | 68 (27.0)  | 57 (22.6)  | 42 (16.7)  | 36 (16.4)  | 30 (15.6)  |
|                             | Flatulence                       | 20 (7.9)  | 55 (21.8)  | 39 (15.5)  | 33 (13.1)  | 30 (13.6)  | 30 (15.6)  |
|                             | Diarrhoea                        | 11 (4.4)  | 35 (13.9)  | 32 (12.7)  | 29 (11.5)  | 12 (5.5)   | 9 (4.7)    |
|                             | Constipation                     | 22 (8.7)  | 30 (11.9)  | 26 (10.3)  | 27 (10.7)  | 11 (5.0)   | 15 (7.8)   |
|                             | Overall                          | 28 (11.1) | 70 (27.8)  | 59 (23.4)  | 48 (19.0)  | 39 (17.7)  | 28 (14.6)  |
|                             | Discontinued challenge [(n (%))] |           |            | 86 (34.1)  | 32 (12.7)  | 28 (12.7)  | 26 (13.5)  |
| Cottage cheese              | Symptoms                         | N=63      | N=63       | N=63       | N=63       | N=45       | N=43       |
|                             | Abdominal pain                   | 8 (12.7)  | 22 (34.9)  | 17 (27.0)  | 16 (25.4)  | 3 (6.7)    | 7 (16.3)   |
|                             | Bloating                         | 6 (9.5)   | 19 (30.2)  | 16 (25.4)  | 15 (23.8)  | 3 (6.7)    | 5 (11.6)   |
|                             | Flatulence                       | 6 (9.5)   | 16 (25.4)  | 12 (19.0)  | 12 (19.0)  | 5 (11.1)   | 6 (14.0)   |
|                             | Diarrhoea                        | 3 (4.8)   | 16 (25.4)  | 14 (22.2)  | 15 (23.8)  | 3 (6.7)    | 3 (7.0)    |
|                             | Constipation                     | 8 (12.7)  | 11 (17.5)  | 9 (14.3)   | 12 (19.0)  | 2 (4.4)    | 2 (4.7)    |
|                             | Overall                          | 9 (14.3)  | 21 (33.3)  | 17 (27.0)  | 16 (25.4)  | 4 (8.9)    | 6 (14.0)   |
|                             | Discontinued challenge [(n (%))] |           |            | 22 (34.9)  | 18 (28.6)  | 2 (4.4)    | 2 (4.7)    |
| Cream cheese                | Symptoms                         | N=56      | N=56       | N=56       | N=56       | N=39       | N=37       |
|                             | Abdominal pain                   | 7 (7.1)   | 19 (33.9)  | 17 (30.4)  | 14 (25.0)  | 3 (7.7)    | 6 (16.2)   |

|           |                                         |              |              |                  |                  |                 |                 |
|-----------|-----------------------------------------|--------------|--------------|------------------|------------------|-----------------|-----------------|
|           | Bloating                                | 5 (8.9)      | 14 (25.0)    | 12 (21.4)        | 12 (21.4)        | 2 (5.1)         | 3 (8.1)         |
|           | Flatulence                              | 5 (8.9)      | 14 (25.0)    | 11 (19.6)        | 10 (17.9)        | 5 (12.8)        | 6 (16.2)        |
|           | Diarrhoea                               | 3 (5.4)      | 12 (21.4)    | 10 (17.9)        | 9 (16.1)         | 4 (10.3)        | 4 (10.8)        |
|           | Constipation                            | 6 (10.7)     | 11 (19.6)    | 10 (17.9)        | 11 (19.6)        | 0 (0.0)         | 1 (2.7)         |
|           | Overall                                 | 7 (12.5)     | 23 (41.1)    | 21 (37.5)        | 16 (28.6)        | 3 (7.7)         | 6 (16.2)        |
|           | <b>Discontinued challenge [(n (%))]</b> |              |              | <b>24 (42.9)</b> | <b>17 (30.4)</b> | <b>2 (5.1)</b>  | <b>5 (13.5)</b> |
| Quark     | <i>Symptoms</i>                         | <i>N=27</i>  | <i>N=27</i>  | <i>N=27</i>      | <i>N=27</i>      | <i>N=19</i>     | <i>N=18</i>     |
|           | Abdominal pain                          | 3 (11.1)     | 7 (25.9)     | 7 (25.9)         | 8 (29.6)         | 1 (5.3)         | 1 (5.6)         |
|           | Bloating                                | 3 (11.1)     | 6 (22.2)     | 6 (22.2)         | 6 (22.2)         | 1 (5.3)         | 1 (5.6)         |
|           | Flatulence                              | 3 (11.1)     | 8 (29.6)     | 7 (25.9)         | 8 (29.6)         | 3 (15.8)        | 2 (11.1)        |
|           | Diarrhoea                               | 2 (7.4)      | 6 (22.2)     | 6 (22.2)         | 6 (22.2)         | 0 (0.0)         | 0 (0.0)         |
|           | Constipation                            | 3 (11.1)     | 5 (18.5)     | 4 (14.8)         | 5 (18.5)         | 2 (10.5)        | 1 (5.6)         |
|           | Overall                                 | 3 (11.1)     | 8 (29.6)     | 8 (29.6)         | 8 (29.6)         | 1 (5.3)         | 1 (5.6)         |
|           | <b>Discontinued challenge [(n (%))]</b> |              |              | <b>10 (37.0)</b> | <b>8 (29.6)</b>  | <b>1 (5.3)</b>  | <b>1 (5.6)</b>  |
| Ricotta   | <i>Symptoms</i>                         | <i>N=27</i>  | <i>N=27</i>  | <i>N=27</i>      | <i>N=27</i>      | <i>N=20</i>     | <i>N=18</i>     |
|           | Abdominal pain                          | 1 (3.7)      | 5 (18.5)     | 5 (18.5)         | 6 (22.2)         | 1 (5.0)         | 0 (0.0)         |
|           | Bloating                                | 5 (18.5)     | 8 (29.6)     | 7 (25.9)         | 8 (29.6)         | 2 (10.0)        | 1 (5.6)         |
|           | Flatulence                              | 3 (11.1)     | 8 (29.6)     | 6 (22.2)         | 7 (25.9)         | 2 (10.0)        | 2 (11.1)        |
|           | Diarrhoea                               | 1 (3.7)      | 7 (25.9)     | 6 (22.2)         | 7 (25.9)         | 2 (10.0)        | 1 (5.6)         |
|           | Constipation                            | 3 (11.1)     | 5 (18.5)     | 5 (18.5)         | 5 (18.5)         | 1 (5.0)         | 0 (0.0)         |
|           | Overall                                 | 3 (11.1)     | 8 (29.6)     | 8 (29.6)         | 9 (33.3)         | 1 (5.0)         | 0 (0.0)         |
|           | <b>Discontinued challenge [(n (%))]</b> |              |              | <b>9 (33.3)</b>  | <b>7 (25.9)</b>  | <b>2 (10.0)</b> | <b>0 (0.0)</b>  |
| Ice cream | <i>Symptoms</i>                         | <i>N=153</i> | <i>N=153</i> | <i>N=153</i>     | <i>N=153</i>     | <i>N=132</i>    | <i>N=118</i>    |
|           | Abdominal pain                          | 10 (6.5)     | 46 (30.1)    | 44 (28.8)        | 24 (15.7)        | 22 (16.7)       | 20 (16.9)       |
|           | Bloating                                | 12 (7.8)     | 44 (28.8)    | 39 (25.5)        | 30 (19.6)        | 21 (15.9)       | 17 (14.4)       |
|           | Flatulence                              | 14 (9.2)     | 49 (32.0)    | 39 (25.5)        | 27 (17.6)        | 24 (18.2)       | 25 (21.2)       |
|           | Diarrhoea                               | 11 (7.2)     | 29 (19.0)    | 23 (15.0)        | 16 (10.5)        | 10 (7.6)        | 16 (13.6)       |
|           | Constipation                            | 7 (4.6)      | 20 (13.1)    | 17 (11.1)        | 11 (7.2)         | 12 (9.1)        | 8 (6.8)         |

|                            |                                         |              |              |                   |                  |                  |                  |
|----------------------------|-----------------------------------------|--------------|--------------|-------------------|------------------|------------------|------------------|
|                            | Overall                                 | 12 (7.8)     | 53 (34.6)    | 48 (31.4)         | 29 (19.0)        | 30 (22.7)        | 23 (19.5)        |
|                            | <b>Discontinued challenge [(n (%))]</b> |              |              | <b>57 (37.3)</b>  | <b>21 (13.7)</b> | <b>14 (10.6)</b> | <b>22 (18.6)</b> |
| Dairy milk<br>custard      | <i>Symptoms</i>                         | <i>N=44</i>  | <i>N=44</i>  | <i>N=44</i>       | <i>N=44</i>      | <i>N=36</i>      | <i>N=36</i>      |
|                            | Abdominal pain                          | 2 (4.5)      | 9 (20.5)     | 7 (15.9)          | 7 (15.9)         | 1 (2.8)          | 4 (11.1)         |
|                            | Bloating                                | 3 (6.8)      | 8 (19.2)     | 5 (11.4)          | 7 (15.9)         | 3 (8.3)          | 4 (11.1)         |
|                            | Flatulence                              | 3 (6.8)      | 9 (20.5)     | 5 (11.4)          | 7 (15.9)         | 2 (5.6)          | 5 (13.9)         |
|                            | Diarrhoea                               | 2 (4.5)      | 10 (22.7)    | 7 (15.9)          | 7 (15.9)         | 4 (11.1)         | 6 (16.7)         |
|                            | Constipation                            | 3 (6.8)      | 5 (11.4)     | 4 (9.1)           | 5 (11.4)         | 1 (2.8)          | 1 (2.8)          |
|                            | Overall                                 | 3 (6.8)      | 9 (20.5)     | 7 (15.9)          | 7 (15.9)         | 3 (8.3)          | 4 (11.1)         |
|                            | <b>Discontinued challenge [(n (%))]</b> |              |              | <b>11 (25.0)</b>  | <b>8 (18.2)</b>  | <b>0 (0.0)</b>   | <b>3 (8.3)</b>   |
| <b>FRUCTOSE CHALLENGES</b> |                                         |              |              |                   |                  |                  |                  |
| Honey                      | <i>Symptoms</i>                         | <i>N=510</i> | <i>N=510</i> | <i>N=510</i>      | <i>N=510</i>     | <i>N=471</i>     | <i>N=445</i>     |
|                            | Abdominal pain                          | 29 (5.7)     | 66 (12.9)    | 54 (10.6)         | 36 (7.1)         | 31 (6.6)         | 36 (8.1)         |
|                            | Bloating                                | 34 (6.7)     | 75 (14.7)    | 56 (11.0)         | 51 (10.0)        | 35 (7.4)         | 38 (8.5)         |
|                            | Flatulence                              | 29 (5.7)     | 70 (13.7)    | 50 (9.8)          | 44 (8.6)         | 36 (7.6)         | 40 (9.0)         |
|                            | Diarrhoea                               | 16 (3.1)     | 32 (6.3)     | 26 (5.1)          | 19 (3.7)         | 19 (4.0)         | 18 (4.0)         |
|                            | Constipation                            | 23 (4.5)     | 38 (7.5)     | 22 (4.3)          | 27 (5.3)         | 22 (4.7)         | 23 (5.2)         |
|                            | Overall                                 | 38 (7.5)     | 101 (19.8)   | 77 (15.1)         | 49 (9.6)         | 43 (9.1)         | 57 (12.8)        |
|                            | <b>Discontinued challenge [(n (%))]</b> |              |              | <b>118 (23.1)</b> | <b>39 (7.6)</b>  | <b>26 (5.5)</b>  | <b>53 (11.9)</b> |
| Broccoli                   | <i>Symptoms</i>                         | <i>N=383</i> | <i>N=383</i> | <i>N=383</i>      | <i>N=383</i>     | <i>N=345</i>     | <i>N=310</i>     |
|                            | Abdominal pain                          | 22 (5.7)     | 69 (18.0)    | 58 (15.1)         | 29 (8.4)         | 31 (10.0)        | 69 (18.0)        |
|                            | Bloating                                | 31 (8.1)     | 80 (20.9)    | 69 (18.0)         | 44 (12.8)        | 34 (11.0)        | 80 (20.9)        |
|                            | Flatulence                              | 32 (8.4)     | 78 (20.4)    | 62 (16.2)         | 43 (12.5)        | 39 (12.6)        | 78 (20.4)        |
|                            | Diarrhoea                               | 18 (4.7)     | 33 (8.6)     | 30 (7.8)          | 18 (5.2)         | 14 (4.5)         | 33 (8.6)         |
|                            | Constipation                            | 18 (4.7)     | 23 (6.0)     | 16 (4.2)          | 18 (5.2)         | 14 (4.5)         | 23 (6.0)         |
|                            | Overall                                 | 28 (7.3)     | 82 (21.4)    | 75 (19.6)         | 39 (11.3)        | 33 (10.6)        | 82 (21.4)        |
|                            | <b>Discontinued challenge [(n (%))]</b> |              |              | <b>114 (29.8)</b> | <b>38 (9.9)</b>  | <b>35 (10.1)</b> | <b>41 (13.2)</b> |
| Mango                      | <i>Symptoms</i>                         | <i>N=206</i> | <i>N=206</i> | <i>N=206</i>      | <i>N=206</i>     | <i>N=193</i>     | <i>N=174</i>     |
|                            | Abdominal pain                          | 8 (3.9)      | 41 (19.9)    | 36 (17.5)         | 20 (9.7)         | 25 (13.0)        | 21 (12.1)        |

|             |                                         |             |             |                  |                 |                 |                  |
|-------------|-----------------------------------------|-------------|-------------|------------------|-----------------|-----------------|------------------|
|             | Bloating                                | 14 (6.8)    | 44 (21.4)   | 33 (16.0)        | 25 (12.1)       | 29 (15.0)       | 26 (14.9)        |
|             | Flatulence                              | 8 (3.9)     | 50 (24.3)   | 35 (17.0)        | 20 (9.7)        | 31 (16.1)       | 29 (16.7)        |
|             | Diarrhoea                               | 3 (1.5)     | 17 (8.3)    | 14 (6.8)         | 6 (2.9)         | 11 (5.7)        | 18 (4.0)         |
|             | Constipation                            | 12 (5.8)    | 23 (11.2)   | 16 (7.8)         | 16 (7.8)        | 14 (7.3)        | 15 (8.6)         |
|             | Overall                                 | 11 (5.3)    | 60 (29.1)   | 45 (21.8)        | 24 (11.7)       | 30 (15.5)       | 35 (20.1)        |
|             | <b>Ended challenge [(n (%))]</b>        |             |             | <b>58 (28.2)</b> | <b>13 (6.3)</b> | <b>19 (9.8)</b> | <b>26 (14.9)</b> |
| Sugar snaps | <i>Symptoms</i>                         | <i>N=74</i> | <i>N=74</i> | <i>N=74</i>      | <i>N=74</i>     | <i>N=69</i>     | <i>N=66</i>      |
|             | Abdominal pain                          | 3 (4.1)     | 7 (9.5)     | 5 (6.8)          | 4 (5.4)         | 3 (4.3)         | 3 (4.5)          |
|             | Bloating                                | 5 (6.8)     | 10 (13.5)   | 7 (9.5)          | 6 (8.1)         | 4 (5.8)         | 6 (9.1)          |
|             | Flatulence                              | 4 (5.4)     | 10 (13.5)   | 5 (6.8)          | 6 (8.1)         | 4 (5.8)         | 6 (9.1)          |
|             | Diarrhoea                               | 4 (5.4)     | 5 (6.8)     | 4 (5.4)          | 4 (5.4)         | 2 (2.9)         | 2 (3.0)          |
|             | Constipation                            | 2 (2.7)     | 4 (5.4)     | 1 (1.4)          | 2 (2.7)         | 2 (2.9)         | 3 (4.5)          |
|             | Overall                                 | 4 (5.4)     | 10 (13.5)   | 8 (10.8)         | 4 (5.4)         | 4 (5.8)         | 5 (7.6)          |
|             | <b>Discontinued challenge [(n (%))]</b> |             |             | <b>12 (16.2)</b> | <b>5 (6.8)</b>  | <b>3 (4.3)</b>  | <b>4 (6.1)</b>   |
| Agave syrup | <i>Symptoms</i>                         | <i>N=39</i> | <i>N=39</i> | <i>N=39</i>      | <i>N=39</i>     | <i>N=33</i>     | <i>N=31</i>      |
|             | Abdominal pain                          | 3 (7.7)     | 4 (10.3)    | 4 (10.3)         | 4 (10.3)        | 0 (0.0)         | 1 (3.2)          |
|             | Bloating                                | 3 (7.7)     | 5 (12.8)    | 4 (10.3)         | 5 (12.8)        | 1 (3.0)         | 2 (6.5)          |
|             | Flatulence                              | 4 (10.3)    | 6 (15.4)    | 4 (10.3)         | 7 (17.9)        | 5 (15.2)        | 3 (9.7)          |
|             | Diarrhoea                               | 3 (7.7)     | 3 (7.7)     | 3 (7.7)          | 3 (7.7)         | 0 (0.0)         | 0 (0.0)          |
|             | Constipation                            | 4 (10.3)    | 3 (7.7)     | 3 (7.7)          | 4 (10.3)        | 2 (6.1)         | 1 (3.2)          |
|             | Overall                                 | 3 (7.7)     | 4 (10.3)    | 4 (10.3)         | 5 (12.8)        | 0 (0.0)         | 1 (3.2)          |
|             | <b>Discontinued challenge [(n (%))]</b> |             |             | <b>10 (25.6)</b> | <b>6 (15.4)</b> | <b>2 (6.1)</b>  | <b>2 (6.5)</b>   |
| Fig (fresh) | <i>Symptoms</i>                         | <i>N=38</i> | <i>N=38</i> | <i>N=38</i>      | <i>N=38</i>     | <i>N=32</i>     | <i>N=29</i>      |
|             | Abdominal pain                          | 1 (2.6)     | 7 (18.4)    | 7 (18.4)         | 6 (15.8)        | 2 (6.3)         | 2 (6.9)          |
|             | Bloating                                | 3 (7.9)     | 11 (28.9)   | 9 (23.7)         | 7 (18.4)        | 5 (15.6)        | 5 (17.2)         |
|             | Flatulence                              | 5 (13.2)    | 9 (23.7)    | 8 (21.1)         | 8 (21.1)        | 4 (12.5)        | 3 (10.3)         |
|             | Diarrhoea                               | 0 (0.0)     | 4 (10.5)    | 4 (10.5)         | 3 (7.9)         | 2 (6.3)         | 2 (6.9)          |
|             | Constipation                            | 2 (5.3)     | 8 (21.1)    | 6 (15.8)         | 6 (15.8)        | 2 (6.3)         | 5 (17.2)         |



|                              |                                  |          |           |            |           |           |           |
|------------------------------|----------------------------------|----------|-----------|------------|-----------|-----------|-----------|
|                              | Overall                          | 2 (5.3)  | 10 (26.3) | 10 (26.3)  | 7 (18.4)  | 4 (12.5)  | 4 (13.8)  |
|                              | Discontinued challenge [(n (%))] |          |           | 14 (36.8)  | 6 (15.8)  | 3 (9.4)   | 5 (17.2)  |
| Boysenberry                  | Symptoms                         | N=25     | N=25      | N=25       | N=25      | N=18      | N=18      |
|                              | Abdominal pain                   | 0 (0.0)  | 2 (8.0)   | 2 (8.0)    | 2 (8.0)   | 0 (0.0)   | 0 (0.0)   |
|                              | Bloating                         | 0 (0.0)  | 2 (8.0)   | 2 (8.0)    | 3 (12.0)  | 0 (0.0)   | 0 (0.0)   |
|                              | Flatulence                       | 2 (8.0)  | 3 (12.0)  | 2 (8.0)    | 3 (12.0)  | 0 (0.0)   | 1 (5.6)   |
|                              | Diarrhoea                        | 1 (4.0)  | 2 (8.0)   | 2 (8.0)    | 2 (8.0)   | 0 (0.0)   | 0 (0.0)   |
|                              | Constipation                     | 2 (8.0)  | 1 (4.0)   | 1 (4.0)    | 3 (12.0)  | 0 (0.0)   | 0 (0.0)   |
|                              | Overall                          | 1 (4.0)  | 3 (12.0)  | 3 (12.0)   | 3 (12.0)  | 0 (0.0)   | 0 (0.0)   |
|                              | Discontinued challenge [(n (%))] |          |           | 8 (32.0)   | 7 (28)    | 0 (0.0)   | 1 (5.6)   |
| SORBITOL (POLYOL) CHALLENGES |                                  |          |           |            |           |           |           |
| Avocado                      | Symptoms                         | N=397    | N=397     | N=397      | N=397     | N=362     | N=337     |
|                              | Abdominal pain                   | 21 (5.3) | 62 (15.6) | 52 (13.1)  | 37 (9.3)  | 27 (7.05) | 31 (9.2)  |
|                              | Bloating                         | 34 (8.6) | 78 (19.6) | 59 (14.9)  | 50 (12.6) | 37 (10.2) | 42 (12.5) |
|                              | Flatulence                       | 24 (6.0) | 75 (18.9) | 53 (13.4)  | 42 (10.6) | 33 (9.1)  | 43 (12.8) |
|                              | Diarrhoea                        | 9 (2.3)  | 20 (5.0)  | 14 (3.5)   | 17 (4.3)  | 11 (3.0)  | 8 (2.4)   |
|                              | Constipation                     | 26 (6.5) | 35 (8.8)  | 20 (5.0)   | 25 (6.3)  | 21 (5.8)  | 22 (6.5)  |
|                              | Overall                          | 26 (6.5) | 79 (19.9) | 66 (16.6)  | 41 (10.3) | 33 (9.1)  | 39 (11.6) |
|                              | Discontinued challenge [(n (%))] |          |           | 102 (25.7) | 35 (8.8)  | 25 (6.9)  | 42 (12.5) |
| Blackberry                   | Symptoms                         | N=168    | N=168     | N=168      | N=168     | N=158     | N=151     |
|                              | Abdominal pain                   | 7 (4.2)  | 24 (14.3) | 19 (11.3)  | 13 (7.7)  | 14 (8.9)  | 16 (10.6) |
|                              | Bloating                         | 13 (7.7) | 36 (21.4) | 26 (15.5)  | 22 (13.1) | 19 (12.0) | 23 (15.2) |
|                              | Flatulence                       | 7 (4.2)  | 28 (16.7) | 19 (11.3)  | 17 (10.1) | 15 (9.5)  | 16 (10.6) |
|                              | Diarrhoea                        | 7 (4.2)  | 17 (10.1) | 15 (8.9)   | 12 (7.1)  | 8 (5.1)   | 9 (6.0)   |
|                              | Constipation                     | 11 (6.5) | 15 (8.9)  | 10 (6.0)   | 13 (7.7)  | 9 (5.7)   | 10 (6.6)  |
|                              | Overall                          | 14 (8.3) | 35 (20.8) | 27 (16.1)  | 18 (10.7) | 13 (8.2)  | 22 (14.6) |
|                              | Discontinued challenge [(n (%))] |          |           | 36 (21.4)  | 10 (6.0)  | 7 (4.4)   | 19 (12.6) |
| Lychee                       | Symptoms                         | N=45     | N=45      | N=45       | N=45      | N=36      | N=35      |

|                              |                                  |           |           |           |           |           |           |
|------------------------------|----------------------------------|-----------|-----------|-----------|-----------|-----------|-----------|
|                              | Abdominal pain                   | 6 (13.3)  | 10 (22.2) | 7 (15.6)  | 8 (17.8)  | 2 (5.6)   | 4 (11.4)  |
|                              | Bloating                         | 9 (20.0)  | 12 (26.7) | 7 (15.6)  | 9 (20.0)  | 4 (11.1)  | 6 (17.1)  |
|                              | Flatulence                       | 9 (20.0)  | 12 (26.7) | 7 (15.6)  | 9 (20.0)  | 5 (13.9)  | 6 (17.1)  |
|                              | Diarrhoea                        | 4 (8.9)   | 7 (15.6)  | 5 (11.1)  | 5 (11.1)  | 2 (5.6)   | 3 (8.6)   |
|                              | Constipation                     | 6 (13.3)  | 7 (15.6)  | 4 (8.9)   | 4 (8.9)   | 2 (5.6)   | 4 (11.4)  |
|                              | Overall                          | 8 (17.8)  | 41 (31.1) | 8 (17.8)  | 10 (22.2) | 4 (11.1)  | 7 (20.0)  |
|                              | Discontinued challenge [(n (%))] |           |           | 11 (24.4) | 9 (20.0)  | 1 (2.8)   | 1 (2.9)   |
| MANNITOL (POLYOL) CHALLENGES |                                  |           |           |           |           |           |           |
| Mushrooms                    | Symptoms                         | N=310     | N=310     | N=310     | N=310     | N=276     | N=260     |
|                              | Abdominal pain                   | 16 (5.2)  | 61 (19.7) | 52 (16.8) | 37 (11.9) | 30 (10.9) | 26 (10.0) |
|                              | Bloating                         | 28 (9.0)  | 68 (21.9) | 53 (17.1) | 38 (12.3) | 33 (12.0) | 36 (13.8) |
|                              | Flatulence                       | 20 (6.5)  | 66 (21.3) | 43 (13.9) | 39 (12.6) | 36 (13.0) | 38 (14.6) |
|                              | Diarrhoea                        | 19 (6.1)  | 32 (10.3) | 23 (7.4)  | 17 (5.5)  | 14 (5.1)  | 17 (6.5)  |
|                              | Constipation                     | 16 (5.2)  | 37 (11.9) | 23 (7.4)  | 23 (7.4)  | 21 (7.6)  | 25 (9.6)  |
|                              | Overall                          | 19 (6.1)  | 72 (23.2) | 59 (19.0) | 33 (10.6) | 31 (11.2) | 37 (14.2) |
|                              | Discontinued challenge [(n (%))] |           |           | 89 (28.7) | 34 (11.0) | 16 (5.8)  | 39 (15.0) |
| Sweet potato                 | Symptoms                         | N=270     | N=270     | N=270     | N=270     | N=248     | N=235     |
|                              | Abdominal pain                   | 12 (4.4)  | 38 (14.1) | 31 (11.5) | 22 (8.1)  | 12 (4.8)  | 17 (7.2)  |
|                              | Bloating                         | 18 (6.7)  | 48 (17.8) | 31 (11.5) | 30 (11.1) | 21 (8.5)  | 24 (10.2) |
|                              | Flatulence                       | 13 (4.8)  | 47 (17.4) | 31 (11.5) | 33 (12.2) | 23 (9.3)  | 27 (11.5) |
|                              | Diarrhoea                        | 8 (3.0)   | 25 (9.3)  | 20 (7.4)  | 12 (4.4)  | 10 (4.0)  | 12 (5.1)  |
|                              | Constipation                     | 6 (2.2)   | 22 (8.1)  | 15 (5.6)  | 11 (4.1)  | 10 (1.0)  | 13 (5.5)  |
|                              | Overall                          | 14 (5.2)  | 51 (18.9) | 38 (14.1) | 31 (11.5) | 21 (8.5)  | 25 (10.6) |
|                              | Discontinued challenge [(n (%))] |           |           | 56 (20.7) | 22 (8.1)  | 13 (5.2)  | 21 (8.9)  |
| Cauliflower                  | Symptoms                         | N=203     | N=203     | N=203     | N=203     | N=173     | N=157     |
|                              | Abdominal pain                   | 17 (8.4)  | 49 (24.1) | 39 (19.2) | 39 (19.2) | 21 (12.1) | 18 (11.5) |
|                              | Bloating                         | 26 (12.8) | 58 (28.6) | 45 (22.2) | 42 (20.7) | 26 (15.0) | 27 (17.2) |
|                              | Flatulence                       | 22 (10.8) | 54 (26.6) | 42 (20.7) | 39 (19.2) | 32 (18.5) | 27 (17.2) |

|        |                                         |              |              |                  |                  |                 |                  |
|--------|-----------------------------------------|--------------|--------------|------------------|------------------|-----------------|------------------|
|        | Diarrhoea                               | 9 (4.4)      | 22 (10.8)    | 18 (8.9)         | 15 (7.4)         | 9 (5.2)         | 10 (6.4)         |
|        | Constipation                            | 14 (6.9)     | 27 (13.3)    | 16 (7.9)         | 20 (9.9)         | 15 (8.7)        | 16 (10.2)        |
|        | Overall                                 | 22 (10.8)    | 62 (30.5)    | 50 (24.6)        | 42 (20.7)        | 27 (15.6)       | 27 (17.2)        |
|        | <b>Discontinued challenge [(n (%))]</b> |              |              | <b>66 (32.5)</b> | <b>30 (14.8)</b> | <b>16 (9.2)</b> | <b>20 (12.7)</b> |
| Celery | <i>Symptoms</i>                         | <i>N=167</i> | <i>N=167</i> | <i>N=167</i>     | <i>N=167</i>     | <i>N=150</i>    | <i>N=137</i>     |
|        | Abdominal pain                          | 8 (4.8)      | 26 (15.6)    | 24 (14.4)        | 15 (9.0)         | 14 (9.3)        | 11 (8.0)         |
|        | Bloating                                | 10 (6.0)     | 31 (18.6)    | 22 (13.2)        | 18 (10.8)        | 14 (9.3)        | 16 (11.7)        |
|        | Flatulence                              | 7 (4.2)      | 30 (18.0)    | 24 (13.4)        | 13 (7.8)         | 18 (12.0)       | 16 (11.7)        |
|        | Diarrhoea                               | 1 (0.6)      | 14 (8.4)     | 11 (6.6)         | 6 (3.6)          | 6 (4.0)         | 7 (5.1)          |
|        | Constipation                            | 9 (5.4)      | 11 (6.6)     | 7 (4.2)          | 9 (5.4)          | 11 (7.3)        | 4 (2.9)          |
|        | Overall                                 | 11 (6.6)     | 35 (21.0)    | 30 (18.0)        | 18 (10.8)        | 16 (10.7)       | 18 (13.1)        |
|        | <b>Discontinued challenge [(n (%))]</b> |              |              | <b>49 (29.3)</b> | <b>17 (10.2)</b> | <b>13 (8.7)</b> | <b>19 (13.9)</b> |
